# Supplementary material for: Long-term culture of human pancreatic slices as a model to study real-time islet regeneration
Source: PubMed Central journal article supplement (PMC7324563; doi:10.1038/s41467-020-17040-8), 2020-06-29
Supplement: 41467_2020_17040_MOESM1_ESM.pdf [file 41467_2020_17040_MOESM1_ESM.pdf]

1 **SUPPLEMENTAL INFORMATION**

2 *Qadir et al, 2020*

- 3
- 4 1. Supplementary Figures 1-5
  - 5 2. Supplementary Tables 1-2

6

**a**

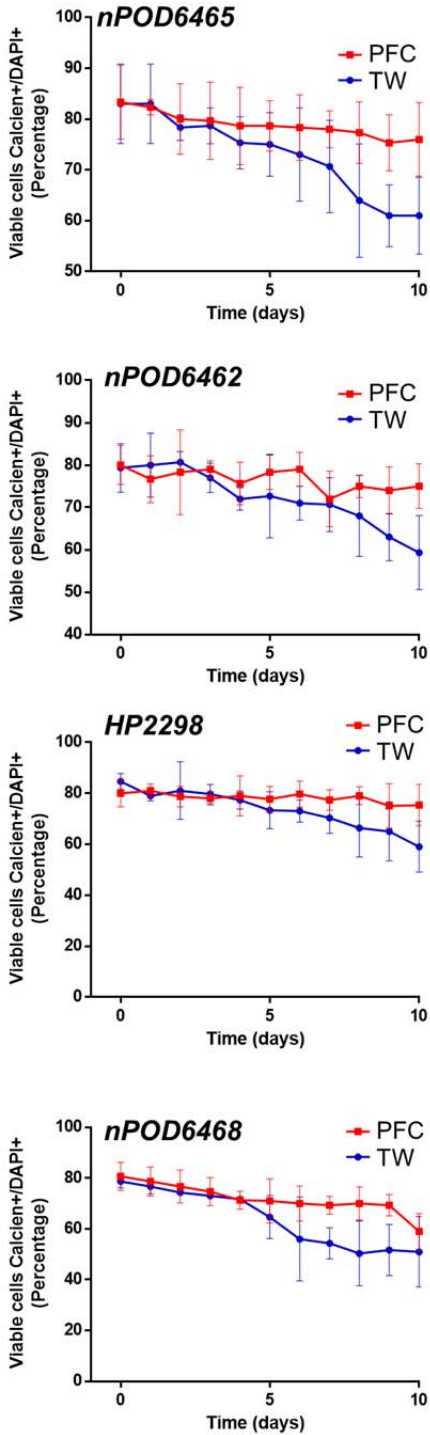

**b**

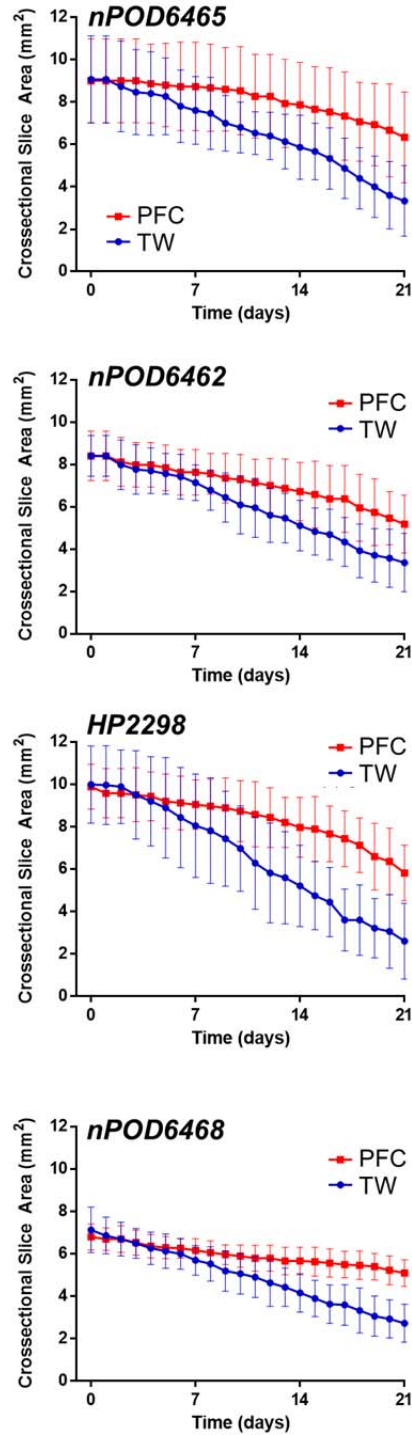

8  
9

**Supplementary Figure 1. Human pancreatic slices remain viable after extended culture atop PFC dishes.**

(a) Viable cell percentage of human pancreatic slices cultured atop PFC-based and transwell membranes as a function of time (10 days). Red: PFC; blue: transwells ( $n = 4$ ). (b) Cross-sectional area (sq. mm) of HPSs over

11

12 21 days of culture atop PFC/Si and transwell dishes. Red: PFC; blue: transwells. De-identified sample numbers  
13 from nPOD or the Diabetes research Institute's cGMP facility are indicated for each graphic ( $n = 4$ ). Data in (a-  
14 b) are presented as mean  $\pm$  SD. Each  $n$  further represents the mean of 3 technical replicates, while plotted  
15 bars/lines are centered at mean.

16

17

18

19

20

21

22

23

24

25

26

27

28

29

30

31

32

33

34

35

36

37

38

39

40

41

42

43

44

45

46

47

48

49

50

51

52

53

54

55

56

57

58

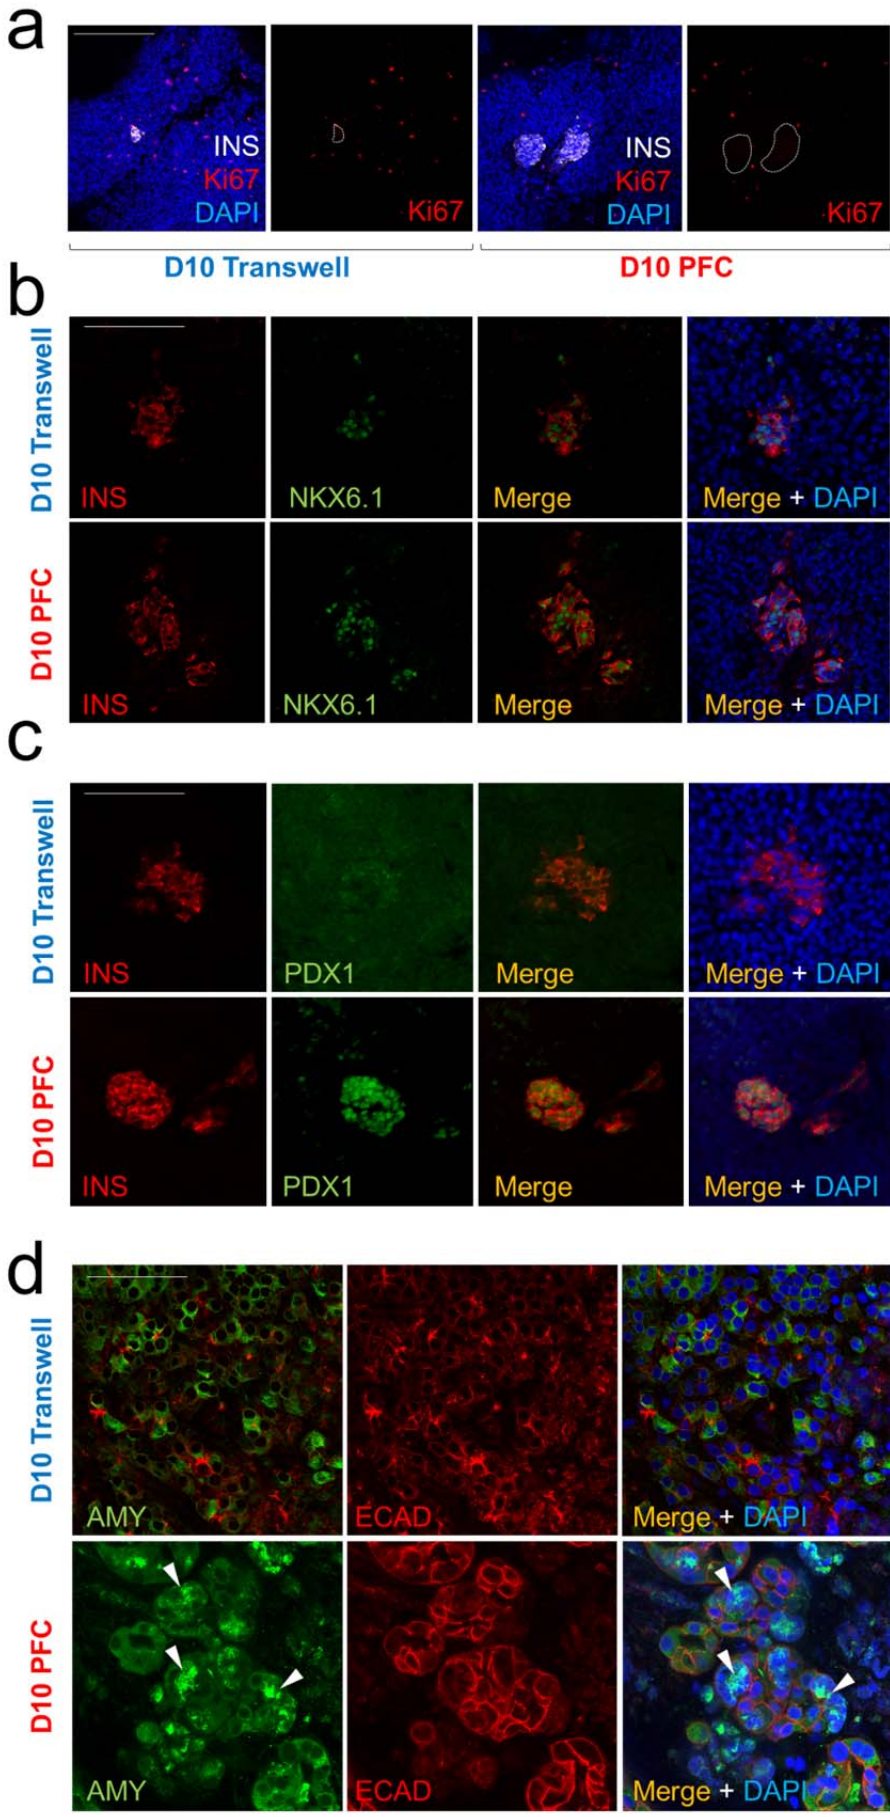

61 **Supplementary Figure 2. Immunofluorescence (IF) analysis of long-term cultured slices shows**  
62 **differences in key epithelial, endocrine and acinar markers between transwell and PFC conditions, but**  
63 **not in  $\beta$ -cell turnover. (a)** Representative Ki67 (red) IF microphotograph of transwell- (first and second  
64 panels) and PFC-cultured (second and third panels) human pancreatic slices. Insulin (INS) is shown in light  
65 grey, and nuclear counterstaining (DAPI), in blue. Most Ki67<sup>+</sup> cells were found in the exocrine compartment,  
66 with no apparent differences between either condition ( $n = 3$ ). **(b)** Representative IF microphotograph of  
67 NKX6.1 (green) in islets (INS, red) of transwell- (top row) and PFC-cultured (bottom row) human pancreatic  
68 slices. Nuclear counterstaining: DAPI (blue) ( $n = 3$ ). **(c)** Representative IF microphotograph of PDX1 (green) in  
69 islets (INS, red) of transwell- (top row) and PFC-cultured (bottom row) human pancreatic slices. Nuclear  
70 counterstaining: DAPI (blue). PDX1 is barely detectable in transwell-cultured slices after 10 days ( $n = 3$ ). **(d)**  
71 Representative IF microphotograph of amylase (AMY, green) and E-cadherin (ECAD, red) in human pancreatic  
72 slices cultured in transwells (top row) and PFC (bottom row). Nuclear counterstaining: DAPI (blue). Slices  
73 cultured in PFC exhibit a better-preserved E-cadherin acinar tissue ultrastructure and more defined apical  
74 granularity of amylase granules (white arrows) than those cultured in transwells ( $n = 3$ ). Size bars: 200  $\mu\text{m}$  **(a)**;  
75 100  $\mu\text{m}$  **(b, c)**; and 50  $\mu\text{m}$  **(d)**. Each  $n$  further represents the mean of 3 technical replicates.

76  
77  
78  
79  
80  
81  
82  
83  
84  
85  
86  
87  
88  
89  
90  
91  
92  
93  
94  
95  
96

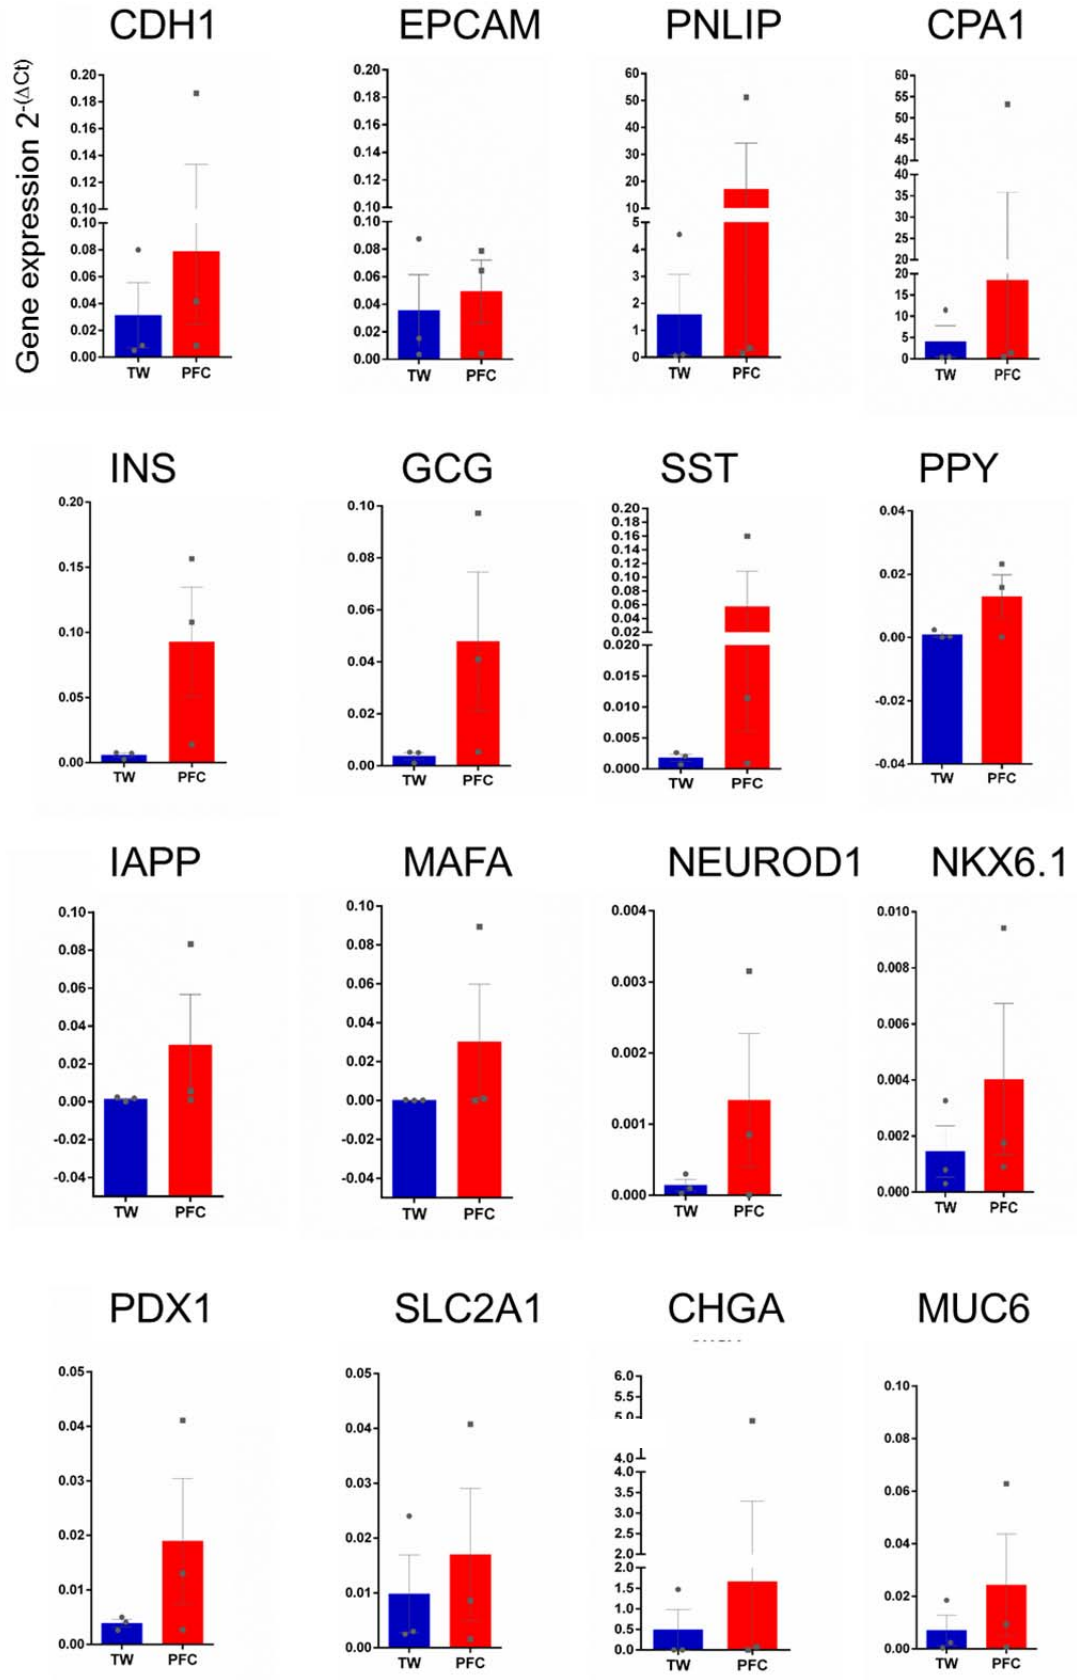

98 **Supplementary Figure 3. qRT-PCR of key pancreatic endocrine and non-endocrine genes in transwell- or**  
 99 **PFC-cultured human pancreatic slices at day 10. Values are represented as 2<sup>-ΔCt</sup> (y-axis) for both transwell-**  
 100 **PFC-cultured human pancreatic slices at day 10. Values are represented as 2<sup>-ΔCt</sup> (y-axis) for both transwell-**

101 (blue columns) and PFC-cultured (red columns) slices. Each data point is the average of 3 technical replicates  
102 for one individual donor ( $n=3$  biologically independent samples from individual donors). In order to compare  
103 the PFC and TW for each gene, we used a two-tailed Wilcoxon rank test. The p-value significance threshold  
104 was defined as 0.05. Owing to high donor-to-donor variability, and despite consistently higher values in PFC  
105 than in transwell conditions, the differences were not statistically significant by two-tailed  $t$ -test. Individual  $p$ -  
106 values: CDH1:  $p=0.4880$ ; EPCAM:  $p=0.7107$ ; PNLIP:  $p=0.4541$ ; CPA1:  $p=0.4997$ ; INS  $p=0.1734$ ; GCG:  
107  $p=0.2401$ ; SST:  $p=0.3917$ ; PPY  $p=0.2158$ ; IAPP:  $p=0.3958$ ; MAFA:  $p=0.4174$ ; NEUROD1:  $p=0.3309$ ;  
108 NKX6.1:  $p=0.3194$ ; PDX1:  $p=0.4671$ ; SLC2A2:  $p=0.6420$ ; CHGA:  $p=0.5517$ ; MUC6:  $p=0.4730$ . Normalizer  
109 housekeeping gene: B2M. Data plotted are presented as mean  $\pm$  SD. Each  $n$  further represents the mean of 3  
110 technical replicates, while plotted bars are centered at mean.

111  
112  
113  
114  
115  
116  
117  
118  
119  
120  
121  
122  
123  
124  
125  
126  
127  
128  
129  
130  
131  
132  
133  
134  
135  
136  
137  
138  
139  
140

141  
142

## Supplementary Figure 4

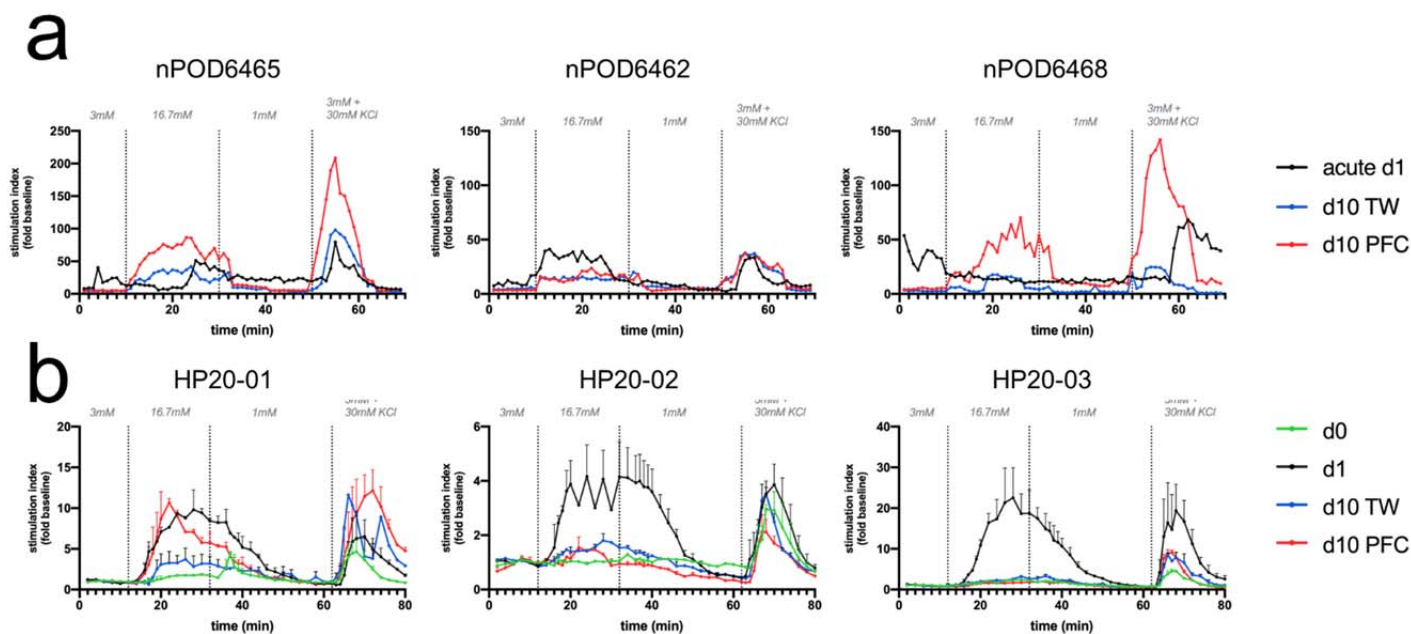

143  
144  
145  
146

147 **Supplementary Figure 4. Dynamic insulin secretion from human pancreatic slices. (a)** Donor-by-donor  
148 profiles of insulin secretion [presented as stimulation index (SI) vs. baseline] after stimulation with 16.7 mM  
149 Glucose and 30 mM KCl. Preparations ( $n=3$ ) used for **Fig. 3a**. For all graphics in this figure, black traces  
150 correspond to day +1<sup>S</sup> (slices shipped from Gainesville); red: PFC-cultured slices for 10 days; and blue:  
151 transwell-cultured slices for 10 days. **(b)** Preparations ( $n=3$ ) used for **Fig. 3g**. For all graphics in this figure,  
152 green is day 0 (perfusion immediately after sectioning); black is day +1 (perfusion after 24h rest); red: PFC-  
153 cultured slices for 10 days; and blue: transwell-cultured slices for 10 days. De-identified sample numbers are  
154 indicated for each graphic. Data plotted in (a-b) are represented by mean  $\pm$  S.E.M. Each  $n$  further represents the  
155 mean of 3 technical replicates, while plotted lines are centered at mean.

156  
157  
158  
159  
160  
161  
162  
163



Supplementary Figure 5

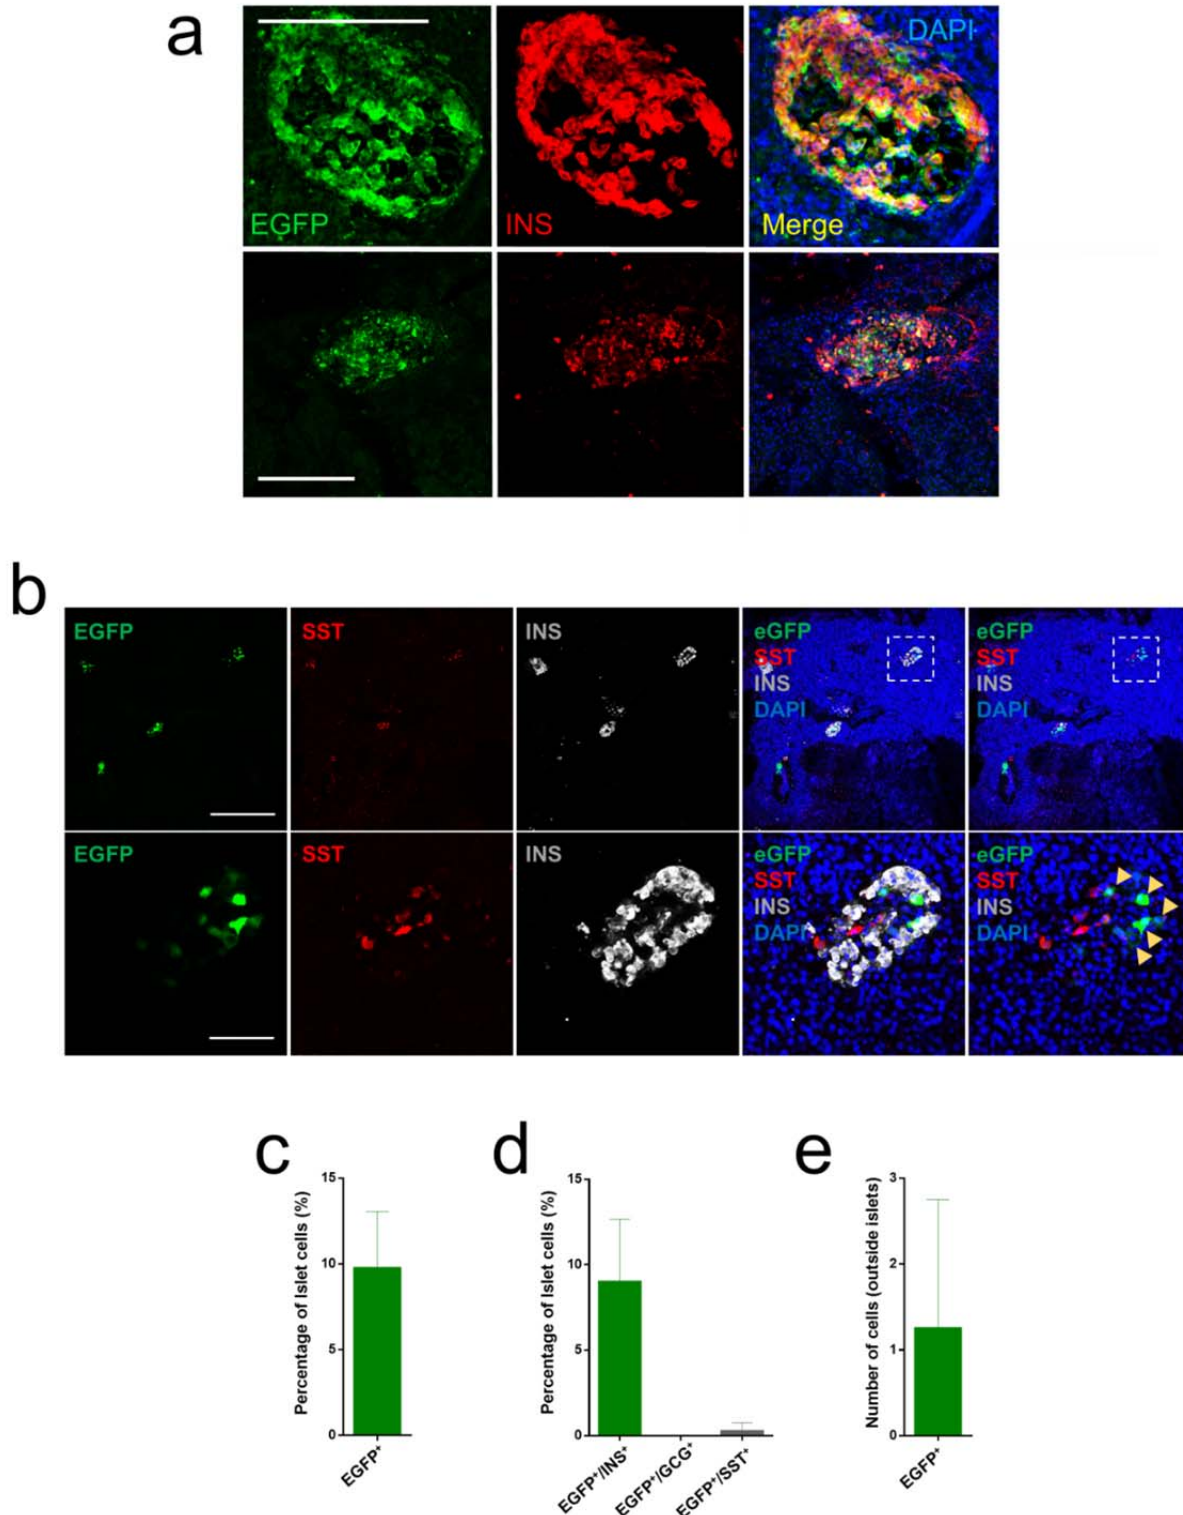

Supplementary Figure 5. Synthetic human Insulin promoter (SHIP) is  $\beta$ -cell specific in human pancreatic

slices. (a) Top and bottom row: representative confocal immunofluorescence images at two different

magnifications of a human pancreatic slice transduced with SHIP-EGFP and counterstained after 48 hours with

insulin ( $n = 4$ ). (b) Representative confocal immunofluorescence imaging of a region of a human pancreatic

171 slice containing islet-resident  $\beta$ -cells tagged by a SHIP-EGFP adenovirus. The lower row shows a magnified  
172 region for each channel of an islet with untagged  $\delta$ -cells (SST, somatostatin<sup>+</sup>), whereas some  $\beta$ -cells (insulin<sup>+</sup>)  
173 are labeled by SHIP-EGFP ( $n = 4$ ). **(c)** Percentage of EGFP-expressing islet cells ( $n = 4$ ). **(d)** Percentage of islet  
174 cells expressing EGFP and either insulin, glucagon or somatostatin ( $n = 4$ ) **(e)** Number of cells outside islet  
175 structures also expressing EGFP ( $n = 4$ ). Size bar: 100  $\mu\text{m}$  **(a)** and 200  $\mu\text{m}$  **(b, top row)**; magnified (lower)  
176 panels in **(b)**: 50  $\mu\text{m}$ . Data plotted in **(c-e)** are presented as mean  $\pm$  SD. Plotted bars are centered at mean.

## Supplementary Table 1. Pancreatic donor demographics

| Sample ID | Diabetes Duration (Years) | Auto Antibody Assay (RIA) | C-Peptide (ng/ml) | Age (Years) | Sex | Ethnicity        | BMI  |
|-----------|---------------------------|---------------------------|-------------------|-------------|-----|------------------|------|
| HP2298    | 0                         | N/A                       | N/A               | 49          | M   | Hispanic         | 25.9 |
| HP2305    | 5/T2D                     | N/A                       | N/A               | 59          | M   | Hispanic         | 30.7 |
| HP2306    | 0                         | N/A                       | N/A               | 50          | F   | Caucasian        | 24.7 |
| HP2307    | 5/T2D                     | N/A                       | N/A               | 54          | F   | Caucasian        | 28.1 |
| HP2309    | 0                         | N/A                       | N/A               | 57          | F   | African American | 29.2 |
| HP2311    | 0                         | N/A                       | N/A               | 59          | F   | African American | 21.7 |
| HP2311    | 0                         | N/A                       | N/A               | 44          | F   | Caucasian        | 29.5 |
| HP2315    | (T2D)                     | N/A                       | N/A               | 61          | M   | Hispanic         | 33.7 |
| HP2316    | 0                         | N/A                       | N/A               | 60          | M   | Caucasian        | 34.8 |
| nPOD6461  | 0                         | Neg                       | 5.26              | 14          | M   | Caucasian        | 18.5 |
| nPOD6462  | 0                         | Neg                       | 7.22              | 11.09       | F   | Caucasian        | 15.2 |
| nPOD6465  | 0                         | Neg                       | 3.42              | 4           | M   | African American | 16.8 |
| nPOD6468  | 0                         | Neg                       | 5.27              | 16          | M   | Caucasian        | 15.9 |
| nPOD6469  | 1.5 (T1D)                 | GADA A+                   | 0.66              | 27          | F   | Caucasian        | 26.9 |
| HP19-01   | 0                         | N/A                       | N/A               | 69          | M   | N/A              | 22.7 |
| HP19-02   | 0                         | N/A                       | 4.9               | 22          | M   | Caucasian        | 20.9 |
| HP19-03   | 0                         | N/A                       | N/a               | 49          | M   | Caucasian        | 26.1 |
| nPOD6516  | 0                         | N/A                       | 5.5               | 20          | M   | Caucasian        | 28.8 |
| HP19-05   | 0                         | N/A                       | 5.3               | 64          | M   | Caucasian        | 17.6 |
| HP20-01   | 0                         | N/A                       | 4.7               | 28          | M   | Hispanic         | 20.3 |
| HP20-02   | 0                         | N/A                       | 5.1               | 31          | M   | N/A              | 31.9 |
| HP20-03   | 0                         | N/A                       | 4.9               | 42          | M   | Caucasian        | 28.1 |
| HP20-04   | 0                         | N/A                       | N/A               | 54          | M   | N/A              | 29.4 |

215  
216**Supplementary Table 2. Table of antibodies used.**

| Antibody to               | Concentration | Host              | Company           | Catalogue number | Reactivity to human |
|---------------------------|---------------|-------------------|-------------------|------------------|---------------------|
|                           | IF            |                   |                   |                  |                     |
| Insulin                   | 1:250         | Guinea Pig        | Dako/Agilent      | A0564            | +++                 |
| Glucagon                  | 1:500         | Mouse             | R&D Systems       | MAB1249          | +++                 |
| Glucagon                  | 1:250         | Rabbit            | Dako/Agilent      | A0565            | +++                 |
| Cytokeratin19             | 1:100         | Rabbit            | Abcam             | ab52625          | +++                 |
| Cytokeratin19             | 1:100         | Mouse             | Dako              | M0888            | +++                 |
| Somatostatin              | 1:50          | Rat               | Millipore         | MAB354           | +++                 |
| Somatostatin              | 1:250         | Rabbit            | Dako/Agilent      | A0566,           | +++                 |
| Alpha Amylase             | 1:100         | Rabbit            | Sigma Aldrich     | A8273            | +++                 |
| Fluo-4, AM, cell permeant | 10uM          | Calcium Indicator | Thermo Scientific | F14201           | +++                 |
| Ki-67 Antibody            | 1:50          | Rabbit            | Sigma Aldrich     | AB9260           | +++                 |
| E-Cadherin                | 1:250         | Mouse             | R&D Systems       | AF748            | +++                 |
| NKX6.1                    | 1:100         | Mouse             | R&D Systems       | AF5857           | +++                 |
| PDX1                      | 15 µg/ml      | Goat              | R&D Systems       | AF2419           | +++                 |

217  
218  
219  
220  
221  
222  
223  
224  
225  
226  
227  
228  
229  
230  
231  
232  
233  
234  
235  
236  
237  
238  
239  
240  
241  
242
