# Supplementary material for: Long-term culture of human pancreatic slices as a model to study real-time islet regeneration
Source: PubMed Central journal article supplement (PMC7324563; doi:10.1038/s41467-020-17040-8), 2020-06-29
Supplement: 41467_2020_17040_MOESM3_ESM.pdf [file 41467_2020_17040_MOESM3_ESM.pdf]

## Description of Additional Supplementary Files

**Title:** Supplementary Data 1

**Description:** Table of key resources used for this research.

**Title:** Supplementary Movie 1

**Description:** Dynamic modeling of oxygen diffusion through HPSs cultured atop PFC membranes.

**Title:** Supplementary Movie 2

**Description:** Dynamic modeling of oxygen diffusion through HPSs cultured atop transwells.

**Title:** Supplementary Movie 3

**Description:** Imaging of the Ca<sup>2+</sup> stimulation of an islet within a human pancreatic slice cultured for 10 days atop a PFC membrane. The video shows stimulation with 16.7 mM glucose and subsequently KCl depolarization.

**Title:** Supplementary Movie 4

**Description:** Imaging of the Ca<sup>2+</sup> stimulation of a human pancreatic slice cultured for 10 days atop a PFC membrane with KCl and carbachol. Only the islet featured in the field responds to the former, whereas only the surrounding exocrine tissue responds to the latter.
